# Supplementary material
Source: Research Square preprint supplement (doi:10.21203/rs.3.rs-8629489/v1)
Supplement: Supplementary file 1 [file 81d93cc61951871269b25965.docx]

Table 1: Baseline Characteristics

| Variable | Category | n (%) |
| --- | --- | --- |
| Gender | Male | 84 (84%) |
|  | Female | 16 (16%) |
| Primary site | Oral cavity | 50 (50%) |
|  | Larynx | 15 (15%) |
|  | Oropharynx | 13 (13%) |
|  | Sinonasal | 7 (7%) |
|  | Hypopharynx | 6 (6%) |
|  | Nasopharynx | 6 (6%) |
|  | Others | 3 (3%) |
| Stage (AJCC 8th) | IVA | 53 (53%) |
|  | III | 28 (28%) |
|  | IVB | 13 (13%) |
|  | I–II | 6 (6%) |
| Histology | Squamous cell carcinoma | 91 (91%) |
|  | Others | 9 (9%) |
